# Supplementary material for: Optimizing agent-based transmission models for infectious diseases
Source: PubMed Central journal article supplement (PMC4450454; doi:10.1186/s12859-015-0612-2), 2015-06-02

**Additional File 1 : Class diagram of the project**

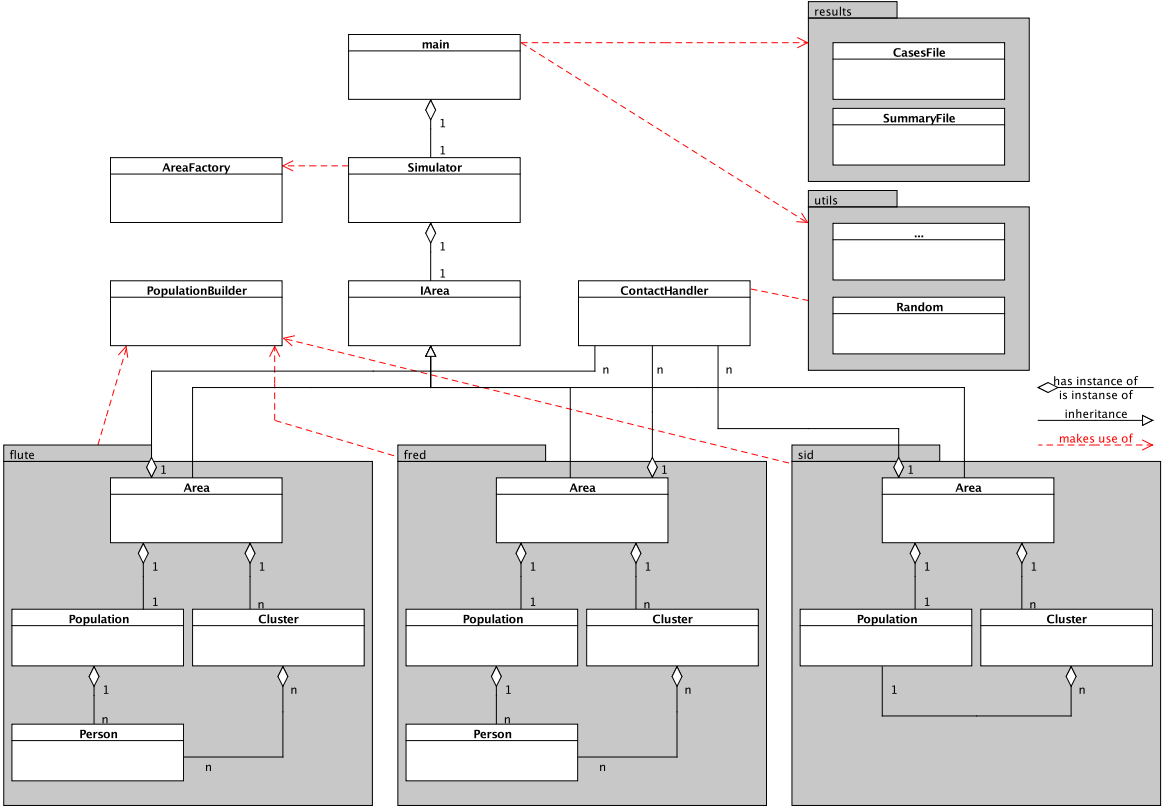

Supplement: 12859_2015_612_MOESM1_ESM.pdf [file 12859_2015_612_MOESM1_ESM.pdf]
