# Supplementary material for: Optimizing agent-based transmission models for infectious diseases
Source: PubMed Central journal article supplement (PMC4450454; doi:10.1186/s12859-015-0612-2), 2015-06-02
Supplement: 12859_2015_612_MOESM4_ESM.pdf [file 12859_2015_612_MOESM4_ESM.pdf]

#### **Additional file 4 : Hardware specifications and extra results.**

This additional file presents the hardware specifications of the used platforms and extra results in addition to the figures in the text. Figure S1 presents all benchmarks with the sequential models for the Nassau and Brooklyn population on CPU type 1. Figure S2 and S3 present similar results for CPU type 2 and 3 respectively. Figure S4 shows the run time according to the number of threads on CPU type 1 for all models with the brooklyn population. Figure S5 presents the OpenMP results for CPU type 2.

#### **Hardware specifications**

| <b>Name</b>   | <b>CPU type 1</b>          | <b>CPU type 2</b>  | <b>CPU type 3</b>  |
|---------------|----------------------------|--------------------|--------------------|
| Configuration | Cluster                    | Desktop            | Cluster            |
| CPU type      | Intel® Xeon® CPU E5-2680V2 | Intel® Xeon® W5580 | AMD Opteron® 6274  |
| CPU speed     | 2.8 GHz                    | 3.20 GHz           | 2.2 GHz            |
| CPU cores     | 20 (2x10)                  | 4                  | 64 (4x16)          |
| RAM           | 64 GB                      | 24 GB              | 192 GB             |
| L1 cache      | 10x64 KB                   | 4x64 KB            | 16x48 KB           |
| L2 cache      | 10x256 KB                  | 4x256 KB           | 16x1024 KB         |
| L3 cache      | 25 MB                      | 8 MB               | 16 MB              |
| Compiler      | GNU gcc 4.8.2              | GNU gcc 4.8.1      | GNU gcc 4.8.1      |
| Platform      | Red Hat 4.4.7-3            | Ubuntu 12.04.4 LTS | Ubuntu 12.04.1 LTS |

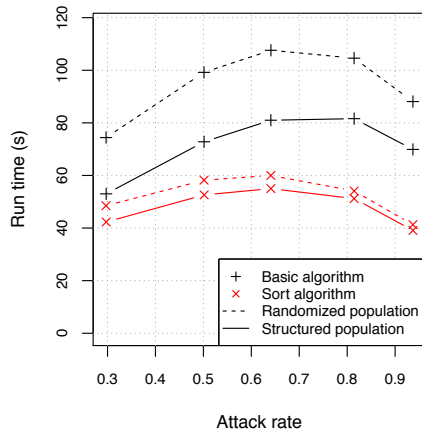

(a) FLUTE, Nassau.

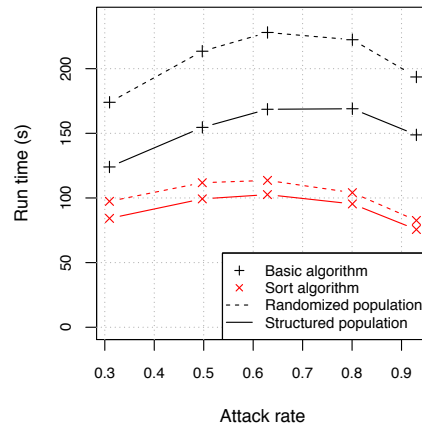

(b) FLUTE, Brooklyn.

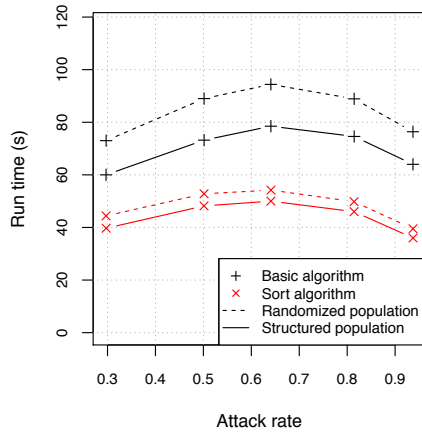

(c) FRED, Nassau.

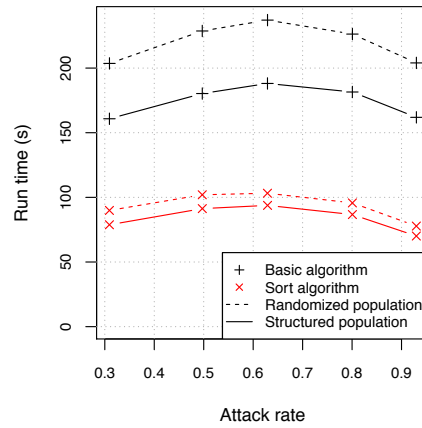

(d) FRED, Brooklyn.

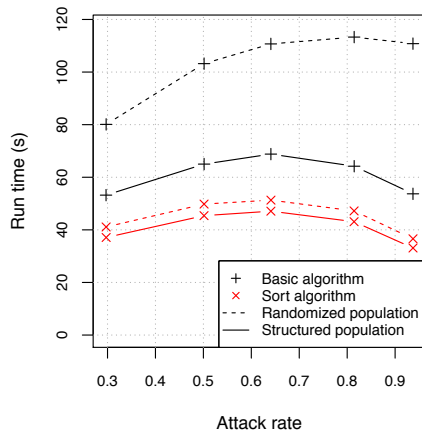

(e) SID, Nassau.

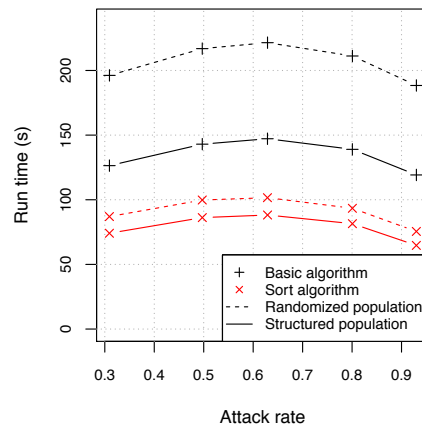

(f) SID, Brooklyn.

Figure S1: Run time according to attack rate for Nassau and Brooklyn simulations on CPU type 1.

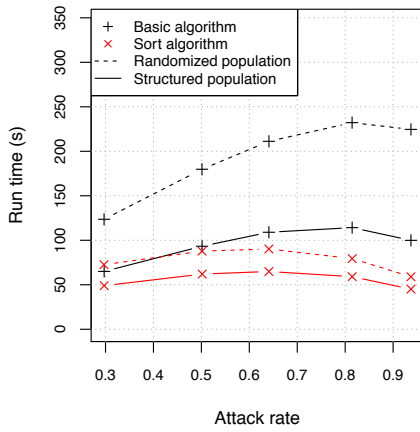

(a) FLUTE, Nassau.

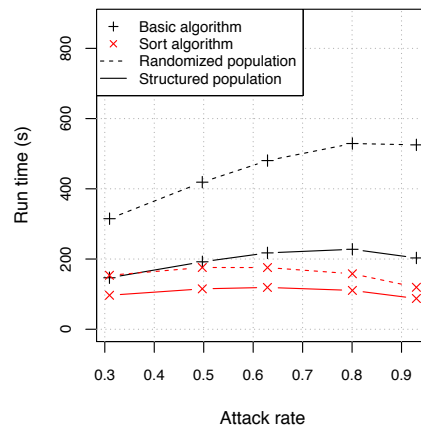

(b) FLUTE, Brooklyn.

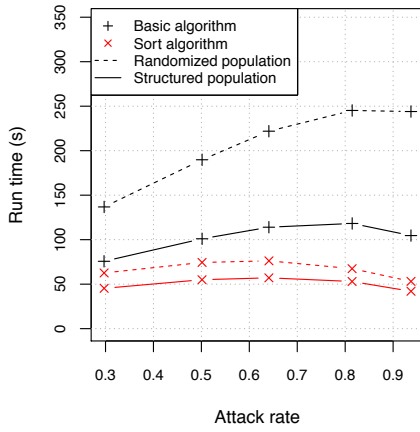

(c) FRED, Nassau.

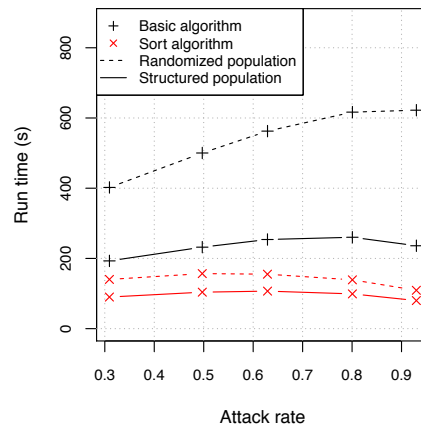

(d) FRED, Brooklyn.

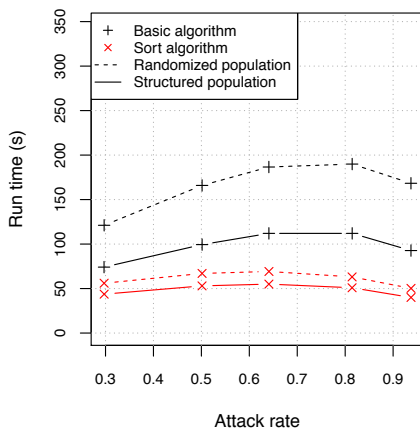

(e) SID, Nassau.

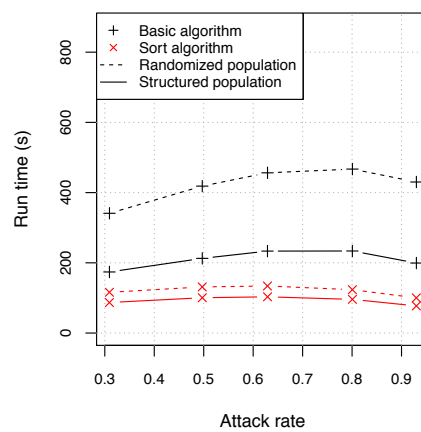

(f) SID, Brooklyn.

Figure S2: Run time according to attack rate for Nassau and Brooklyn simulations on CPU type 2.

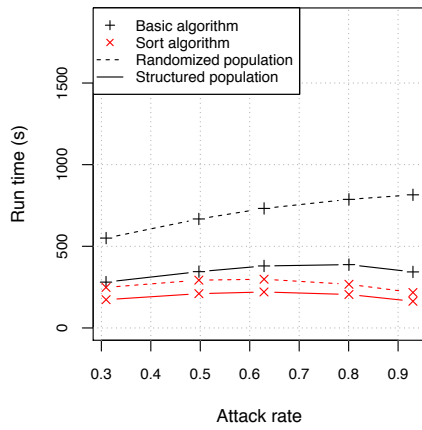

(a) FLUTE, Brooklyn.

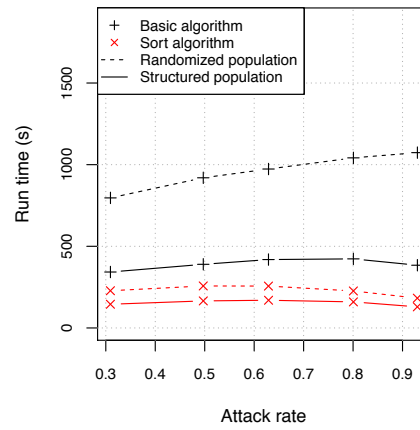

(b) FRED, Brooklyn.

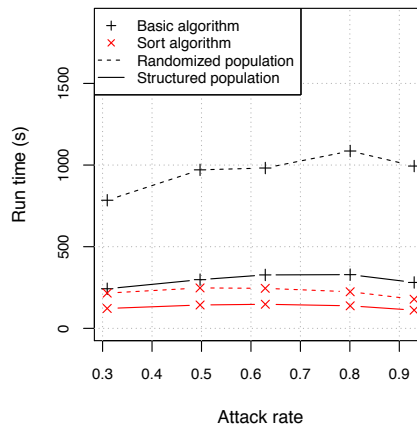

(c) SID, Brooklyn.

Figure S3: Run time according to attack rate for Nassau and Brooklyn simulations on CPU type 3.

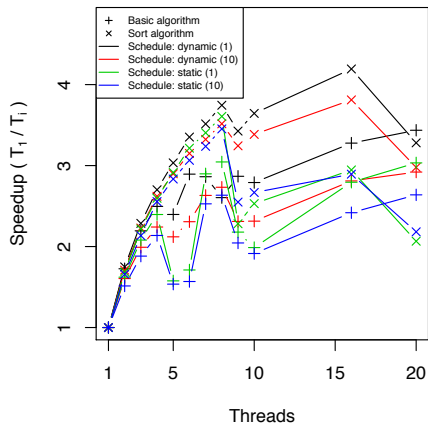

(a) FLUTE, sorted population.

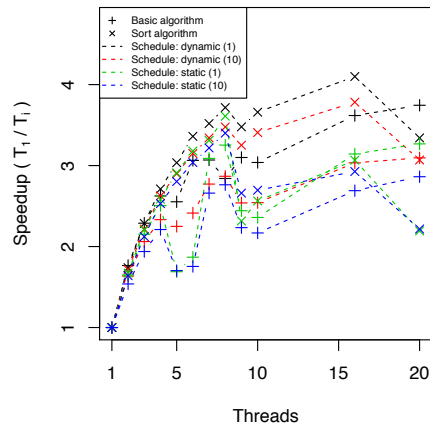

(b) FLUTE, randomized population.

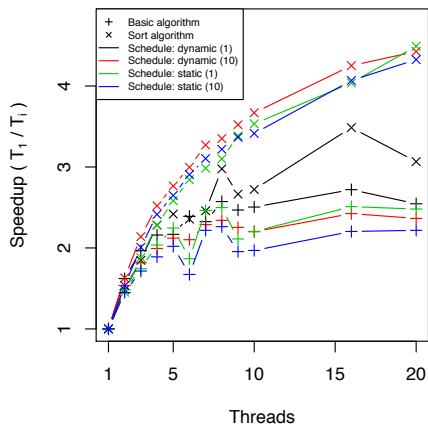

(c) FRED, sorted population.

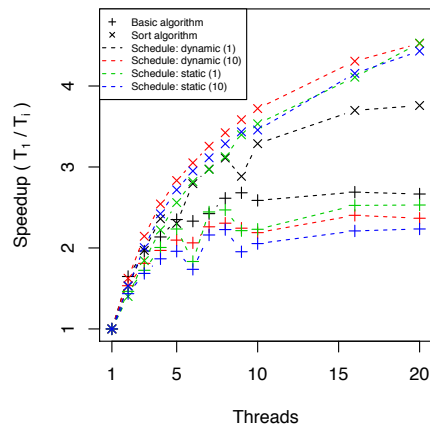

(d) FRED, randomized population.

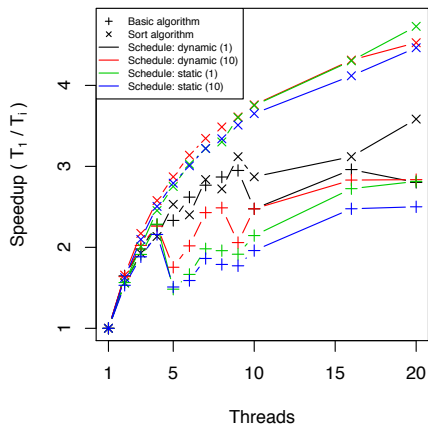

(e) SID, sorted population.

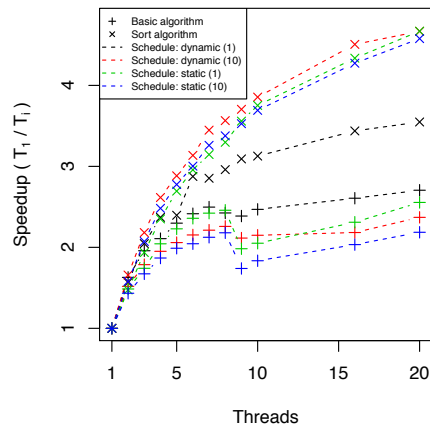

(f) SID, randomized population.

Figure S4: **Speedup according to thread number and scheduling for Brooklyn simulations on CPU type 1** Timing are shown for the basic and sort algorithm with dynamic and static parallel scheduling using workload chunk size of 1 and 10 clusters.

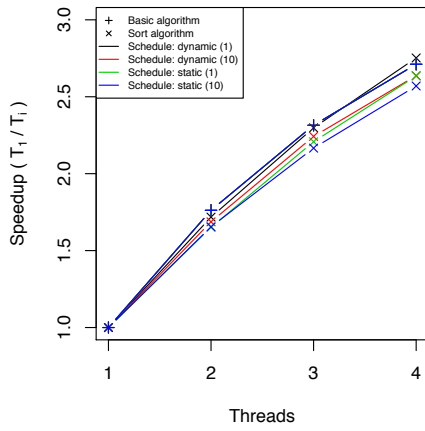

(a) FLUTE, sorted population.

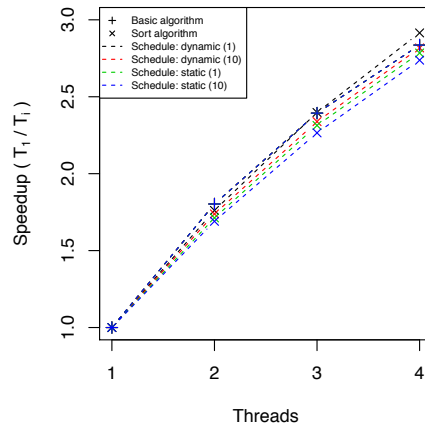

(b) FLUTE, randomized population.

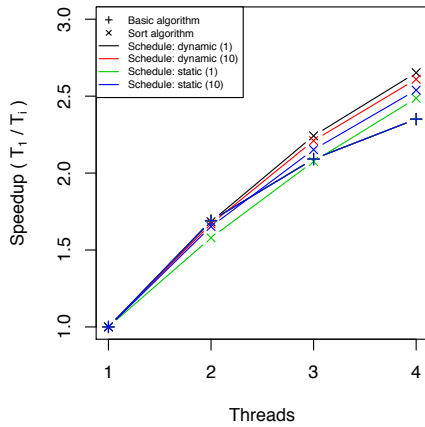

(c) FRED, sorted population.

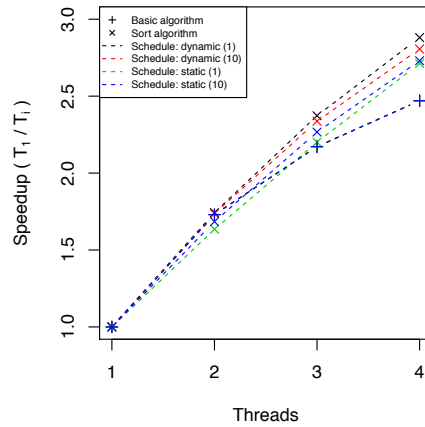

(d) FRED, randomized population.

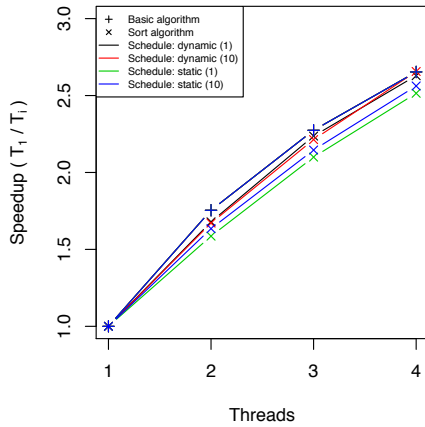

(e) SID, sorted population.

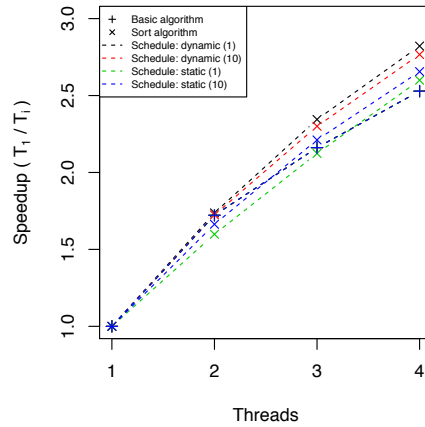

(f) SID, randomized population.

Figure S5: Run times according to thread number and scheduling for Brooklyn simulations on CPU type 2. Timing are shown for the basic and sort algorithm with dynamic scheduling using workload chunk size of 1.
